# Supplementary material for: The Role of Adjuvant Chemotherapy after Neoadjuvant Chemoradiotherapy Followed by Surgery in Patients with Esophageal Squamous Cell Carcinoma
Source: PubMed Central journal article supplement — Cancer Res Treat. 2023 Apr 24;55(4):1231–9. doi: 10.4143/crt.2022.1417 (PMC10582531; doi:10.4143/crt.2022.1417), 2023-04-24
Supplement: crt-2022-1417_S1_Table.pdf [file crt-2022-1417_S1_Table.pdf]

**S1 Table.** Univariable and multivariable analyses for the risk factors for overall survival in patients with ypT+N0 patients

|                       | Univariable analysis |         | Multivariable analysis |         |
|-----------------------|----------------------|---------|------------------------|---------|
|                       | HR (95% CI)          | p-value | HR (95% CI)            | p-value |
| Male sex              | 0.734 (0.260-2.070)  | 0.560   | 0.825 (0.242-2.811)    | 0.759   |
| Age                   | 0.990 (0.957-1.025)  | 0.591   | 0.980 (0.940-1.022)    | 0.354   |
| ypStage (vs. II)      |                      |         |                        |         |
| III                   | 1.196 (0.621-2.300)  | 0.591   | 1.119 (0.557-2.247)    | 0.752   |
| IV                    | 2.593 (0.734-9.150)  | 0.139   | 1.774 (0.431-7.296)    | 0.427   |
| FEV <sub>1</sub>      | 0.682 (0.349-1.331)  | 0.262   | -                      | -       |
| DLC <sub>o</sub>      | 1.006 (0.986-1.027)  | 0.539   | -                      | -       |
| ASA (vs. I)           |                      |         |                        |         |
| II                    | 2.948 (1.186-7.326)  | 0.020   | 3.023 (1.164-7.851)    | 0.023   |
| III                   | 8.782 (2.574-29.968) | 0.001   | 11.399 (3.008-43.197)  | < 0.001 |
| Adjuvant chemotherapy | 1.218 (0.342-4.342)  | 0.760   | -                      | -       |

ASA, American Society of Anesthesiology; CI, confidence interval; DLC<sub>o</sub>, diffusing capacity of the lungs for carbon monoxide; FEV<sub>1</sub>, forced expiratory volume in 1 second; HR, hazard ratio.
