# Supplementary material for: The Role of Adjuvant Chemotherapy after Neoadjuvant Chemoradiotherapy Followed by Surgery in Patients with Esophageal Squamous Cell Carcinoma
Source: PubMed Central journal article supplement — Cancer Res Treat. 2023 Apr 24;55(4):1231–9. doi: 10.4143/crt.2022.1417 (PMC10582531; doi:10.4143/crt.2022.1417), 2023-04-24
Supplement: crt-2022-1417_S2_Table.pdf [file crt-2022-1417_S2_Table.pdf]

**S2 Table.** Univariable and multivariable analyses for the risk factors for overall survival in patients with ypT0N+ patients

|                       | Univariable analysis  |         | Multivariable analysis |         |
|-----------------------|-----------------------|---------|------------------------|---------|
|                       | HR (95% CI)           | p-value | HR (95% CI)            | p-value |
| Male sex              | 0.549 (0.167-1.805)   | 0.323   | 0.425 (0.095-1.894)    | 0.262   |
| Age                   | 0.992 (0.950-1.035)   | 0.723   | 1.000 (0.950-1.053)    | 0.977   |
| ypStage (vs. II)      |                       |         |                        |         |
| III                   | 1.334 (0.612-2.904)   | 0.467   | 1.764 (0.637-4.883)    | 0.275   |
| IV                    | 10.187 (1.244-83.381) | 0.030   | 3.794 (0.317-45.357)   | 0.292   |
| FEV <sub>1</sub>      | 1.111 (0.615-2.006)   | 0.727   | -                      | -       |
| DLC <sub>o</sub>      | 0.983 (0.963-1.003)   | 0.099   | 0.982 (0.958-1.005)    | 0.138   |
| ASA (vs. I)           |                       |         |                        |         |
| II                    | 0.968 (0.460-2.038)   | 0.934   | 0.943 (0.180-4.928)    | 0.945   |
| III                   | 2.811 (0.933-8.472)   | 0.066   | 1.406 (0.211-9.358)    | 0.724   |
| Adjuvant chemotherapy | 1.027 (0.531-1.986)   | 0.936   | -                      | -       |

ASA, American Society of Anesthesiology; CI, confidence interval; DLC<sub>o</sub>, diffusing capacity of the lungs for carbon monoxide; FEV<sub>1</sub>, forced expiratory volume in 1 second; HR, hazard ratio.
